# Supplementary material for: Overcoming Reproductive and Psychological Concerns of Breast Cancer Survivors: A Randomized Controlled Trial
Source: Research Square preprint supplement (doi:10.21203/rs.3.rs-415634/v1), 2021-04-23
Supplement: Supplementary file 1 [file c6901dfbbd49125c3fb356c8.docx]

**Table 1:** Comparison of the demographic characteristics of the patients in the intervention and controlgroups

| Variable | | Control group | | Intervention group | | Statistics |
| --- | --- | --- | --- | --- | --- | --- |
| % | N | % | N |
| Age of patient (year) | 18-28 | 18 | 9 | 12 | 6 | X2=1.89  P=0.38 |
| 29-38 | 36 | 13 | 38 | 19 |
| 39-49 | 56 | 28 | 50 | 25 |
| Marriage duration (year) | 0.5-2 | 4 | 2 | 6 | 3 | P=0.6 |
| 2-5 | 12 | 6 | 8 | 4 |
| 5-10 | 20 | 10 | 30 | 15 |
| >10 | 64 | 32 | 56 | 28 |
| Number of children | 0 | 46 | 23 | 34 | 17 | X2=0.07  P=0.12 |
| 1 | 30 | 15 | 50 | 25 |
| ≥2 | 24 | 12 | 16 | 8 |
| Level of patient's education | Illiterate | 10 | 5 | 14 | 7 | X2=0.82  P=0.41 |
| Under diploma | 54 | 27 | 40 | 20 |
| Diploma | 20 | 10 | 32 | 16 |
| Collegiate | 16 | 8 | 14 | 7 |
| Level of spouse's education | Illiterate | 28 | 14 | 24 | 12 | P=0.71 |
| Under diploma | 28 | 14 | 22 | 11 |
| Diploma | 40 | 20 | 46 | 23 |
| Collegiate | 4 | 2 | 8 | 4 |
| Economic status | Income more than expenses | 16 | 8 | 24 | 12 | X2=0.66  P=0.44 |
| Income less than expenses | 18 | 9 | 22 | 11 |
| Income equals expenses | 66 | 33 | 54 | 27 |
| Method of contraception | Condom | 30 | 15 | 40 | 20 | P=0.49 |
| Contraceptives | 4 | 2 | 6 | 3 |
| Discontinuous | 30 | 15 | 24 | 12 |
| Progesterone ampoules | 4 | 2 | 2 | 1 |
| IUD | 30 | 5 | 20 | 10 |
| Without prevention | 2 | 1 | 8 | 4 |
| Occupation of patient | Employed | 26 | 13 | 34 | 17 | X2=0.76  P=0.38 |
| Housewife | 74 | 37 | 66 | 33 |
| Occupation of spouse | Unemployed | 14 | 7 | 6 | 3 | X2=3.18  P=0.52 |
| Labor | 18 | 9 | 12 | 6 |
| Employed | 22 | 11 | 28 | 14 |
| Self-employed | 34 | 17 | 36 | 8 |
| Retired | 12 | 6 | 18 | 9 |

**Table 2**: Comparison of the clinical characteristics of the patients in the intervention and control groups

| Statistics | Intervention group | | Control group | | Variable | |
| --- | --- | --- | --- | --- | --- | --- |
| N | % | N | % |
| X2=2.80  P=0.24 | 13 | 26 | 19 | 38 | 1-5 | Duration of disease (year) |
| 25 | 50 | 17 | 34 | 5-7 |
| 12 | 24 | 14 | 28 | 7-10 |
| P=0.78 | 11 | 22 | 13 | 26 | 18-28 | Age at the time of diagnosis (year) |
| 18 | 36 | 17 | 34 | 29-38 |
| 21 | 42 | 20 | 40 | 39-49 |
| X2=1.41  P=0.23 | 36 | 72 | 41 | 82 | Mastectomy | Type of surgery |
| 14 | 28 | 9 | 18 | Lumpectomy |
| X2=2.96  P=0.22 | 10 | 20 | 11 | 22 | I | Stage of breast cancer |
| 28 | 56 | 20 | 40 | II |
| 12 | 24 | 19 | 38 | III |
| X2=3.96  P=0.41 | 39 | 78 | 38 | 76 | Hormone therapy | Drug treatment regimen |
| 2 | 4 | 2 | 4 | Herceptin |
| 5 | 10 | 7 | 14 | Herceptin plus hormone therapy |
| 4 | 8 | 3 | 6 | Without medicine |
| X2=1.92  P=0.17 | 32 | 64 | 35 | 70 | HR+/HER2- | Breast cancer subtypes  (receptor variation) |
| 10 | 20 | 8 | 16 | HR-/HER2- |
| 7 | 14 | 5 | 10 | HR+/HER2+ |
| 1 | 2 | 2 | 4 | HR-/HER2+ |

**Table 3:** Comparison Depression Anxiety Stress, Reproductive Concerns and Sexual Function before intervention, two and three months after the intervention in the intervention and control group

| Statistics | Intervention | Control | Group  Time | Variable |
| --- | --- | --- | --- | --- |
| Mean± SD | Mean± SD |
| F=5248.61  P<0.001 | 48.61±5.06 | 49.22±4.76 | Before intervention | Depression Anxiety Stress Scales  (DASS-21) |
| 32.14±4.99 | 48.96±5.16 | Two months post intervention |
| 32.10±4.98 | 48.46±5.38 | Three months post intervention |
| F=12490.61  P<0.001 | F=143.21  P<0.001 | F=1.48  P=0.23 | Tests |
| F=5662.56  P<0.001 | 74.34±1.01 | 74.08±6.74 | Before intervention | Reproductive Concerns After Cancer scale  (RCAC) |
| 46.31±0.76 | 73.64±7.55 | Two months post intervention |
| 47.51±1.02 | 73.28±8.15 | Three months post intervention |
| F=168880.71  P<0.001 | F=26.58  P<0.001 | F=0.27  P=0.76 | Tests |
| F=3814.96  P<0.001 | 80.62±9.40 | 80.64±8.89 | Before intervention | Female Sexual Function Index adaptation for Breast Cancer patients  (FSFI-BC) |
| 95.66±6.43 | 80.58±9.65 | Two months post intervention |
| 95.83±6.29 | 80.38±9.85 | Three months post intervention |
| F=16541.95  P<0.001 | F=74.83  P<0.001 | F=0.129  P=0.87 | Tests |

**Table 4:** Comparison Depression Anxiety Stress, Reproductive Concerns and Sexual Function before and after intervention in the intervention group

| Variable | Group  Time | | Intervention | |
| --- | --- | --- | --- | --- |
| Difference of means | P-value |
| Depression Anxiety Stress Scales  (DASS-21) | Before intervention | 2 months after intervention | 16.46 | <0.001 |
| 3 months after intervention | 16.51 | <0.001 |
| Two months post intervention | 3 months after intervention | 0.04 | 0.72 |
| Reproductive Concerns After Cancer scale  (RCAC) | Before intervention | 2 months after intervention | 28.02 | <0.001 |
| 3 months after intervention | 26.83 | <0.001 |
| Two months post intervention | 3 months after intervention | -1.19 | 0.91 |
| Female Sexual Function Index adaptation for Breast Cancer patients  (FSFI-BC) | Before intervention | 2 months after intervention | -15.04 | <0.001 |
| 3 months after intervention | -15.20 | <0.001 |
| Two months post intervention | 3 months after intervention | -0.16 | 0.69 |
